# Supplementary material for: Rapid Phenotypic Convergence towards Collateral Sensitivity in Clinical Isolates of Pseudomonas aeruginosa Presenting Different Genomic Backgrounds
Source: PubMed Central journal article supplement (PMC9927454; doi:10.1128/spectrum.02276-22), 2022-12-19
Supplement: spectrum.02276-22-s0001.pdf [file spectrum.02276-22-s0001.pdf]

1 **Supplementary Table 1. Susceptibility to ciprofloxacin, aztreonam and tobramycin**  
 2 **of the final populations of *Pseudomonas aeruginosa* after ALE on ciprofloxacin.**

| Population       | MIC ( $\mu\text{g/ml}$ ) |                 |                 |
|------------------|--------------------------|-----------------|-----------------|
|                  | CIP                      | ATM             | TOB             |
| NAV01-005        | 0.5                      | 0.38            | 12              |
| NAV01-005 CIP 1  | 6                        | 0.25            | 8               |
| NAV01-005 CIP 2  | 6                        | 0.19            | 8/3* (42%)      |
| NAV01-005 CIP 3  | 4                        | 0.19            | 6/2 (14%)       |
| NAV01-005 CIP 4  | 6                        | 0.19            | 12/4 (37%)      |
| ARA03-004        | 1                        | 8               | 4               |
| ARA03-004 CIP 1  | 12                       | 4               | 2/1 (14%)       |
| ARA03-004 CIP 2  | 12                       | 64              | 3               |
| ARA03-004 CIP 3  | 8                        | 2               | 1               |
| ARA03-004 CIP 4  | 8                        | 8               | 3               |
| CVA02-003        | 0.38                     | 4               | 48              |
| CVA02-003 CIP 1  | 0.75                     | 3               | 48              |
| CVA02-003 CIP 2  | 0.75                     | 4               | 32              |
| CVA02-003 CIP 3  | 0.75                     | 4               | 48              |
| CVA02-003 CIP 4  | 0.75                     | 4               | 32              |
| FQSE111010       | 0.5                      | 0.75            | $\geq 256^{**}$ |
| FQSE111010 CIP 1 | 6                        | 0.38/0.19 (37%) | 128             |
| FQSE111010 CIP 2 | 4                        | 0.38/0.19 (30%) | 128             |
| FQSE111010 CIP 3 | 4                        | 0.38/0.19 (43%) | 128             |
| FQSE111010 CIP 4 | 4                        | 0.38/0.25 (44%) | 192             |
| ARA02-005        | 0.125                    | 3               | 1               |
| ARA02-005 CIP 1  | 4                        | 0.19            | 0.38            |
| ARA02-005 CIP 2  | 3                        | 0.25            | 0.38            |
| ARA02-005 CIP 3  | 4                        | 0.25            | 0.38            |

|                  |       |              |      |
|------------------|-------|--------------|------|
| ARA02-005 CIP 4  | 12    | 0.38         | 0.25 |
| BAL02-009        | 1     | 2            | 0.5  |
| BAL02-009 CIP 1  | 4     | 1.5          | 0.5  |
| BAL02-009 CIP 2  | 6     | 1.5          | 0.5  |
| BAL02-009 CIP 3  | 16    | 1.5          | 0.5  |
| BAL02-009 CIP 4  | 6     | 1.5          | 0.5  |
| BAL04-002        | 0.125 | 4            | 1    |
| BAL04-002 CIP 1  | 1.5   | 4/0.75 (43%) | 0.5  |
| BAL04-002 CIP 2  | 2     | 0.75         | 0.38 |
| BAL04-002 CIP 3  | 1.5   | 1            | 0.5  |
| BAL04-002 CIP 4  | 2     | 0.75         | 0.5  |
| CAN01-002        | 0.032 | 0.38         | 2    |
| CAN01-002 CIP 1  | 1.5   | 0.19         | 0.75 |
| CAN01-002 CIP 2  | 1     | 0.38         | 4    |
| CAN01-002 CIP 3  | 1     | 0.19         | 1    |
| CAN01-002 CIP 4  | 0.5   | 0.25         | 0.75 |
| CAT09-004        | 0.094 | 3            | 1.5  |
| CAT09-004 CIP 1  | 3     | 0.5          | 0.25 |
| CAT09-004 CIP 2  | 4     | 0.5          | 0.5  |
| CAT09-004 CIP 3  | 1.5   | 0.75         | 0.5  |
| CAT09-004 CIP 4  | 12    | 0.5          | 0.5  |
| FQSE110603       | 0.125 | 0.38         | 3    |
| FQSE110603 CIP 1 | 2     | 0.25         | 1    |
| FQSE110603 CIP 2 | 2     | 0.25         | 1    |
| FQSE110603 CIP 3 | 2     | 0.25         | 0.75 |
| FQSE110603 CIP 4 | 3     | 0.25         | 1    |
| AND04-004A       | 0.125 | 4            | 1    |
| AND04-004A CIP 1 | 1     | 1            | 0.5  |
| AND04-004A CIP 2 | 1     | 1.5          | 0.5  |

|                   |                |              |                 |
|-------------------|----------------|--------------|-----------------|
| AND04-004A CIP 3  | 0.75/12 (34%)  | 1.5          | 0.5             |
| AND04-004A CIP 4  | 0.75           | 2            | 0.5             |
| BAL02-001         | 0.047          | 6            | 2               |
| BAL02-001 CIP 1   | 0.19           | 48           | 2               |
| BAL02-001 CIP 2   | 0.38           | 16/6 (82%)   | 1               |
| BAL02-001 CIP 3   | 0.19           | 48           | 1.5             |
| BAL02-001 CIP 4   | 0.25           | 48           | 2               |
| CAT06-005         | 16             | 4            | 48              |
| CAT06-005 1       | $\geq 32^{**}$ | 1.5          | 24              |
| CAT06-005 CIP 2   | $\geq 32^{**}$ | 3            | 24              |
| CAT06-005 CIP 3   | $\geq 32^{**}$ | 2            | 24              |
| CAT06-005 CIP 4   | $\geq 32^{**}$ | 3            | 16              |
| FQSE15-0803       | 0.38           | 0.38         | 3               |
| FQSE15-0803 CIP 1 | 2/6 (16%)      | 0.25         | 1.5             |
| FQSE15-0803 CIP 2 | 3              | 0.38         | 1               |
| FQSE15-0803 CIP 3 | 1.5/16 (25%)   | 0.38/1 (46%) | 2               |
| FQSE15-0803 CIP 4 | 2              | 0.38         | 2               |
| FQSE24-0304       | 3              | 0.38         | 4               |
| FQSE24-0304 CIP 1 | $\geq 32^{**}$ | 0.75         | 4               |
| FQSE24-0304 CIP 2 | $\geq 32^{**}$ | 0.5          | 3               |
| FQSE24-0304 CIP 3 | $\geq 32^{**}$ | 0.38         | 4               |
| FQSE24-0304 CIP 4 | $\geq 32^{**}$ | 0.5          | 3               |
| CAT02-004         | 0.5            | 12           | 0.75            |
| CAT02-004 CIP 1   | 6              | 12           | 0.38            |
| CAT02-004 CIP 2   | 2              | 6            | 0.38            |
| CAT02-004 CIP 3   | 2              | 8            | 0.75            |
| CAT02-004 CIP 4   | 3              | 6            | 0.38            |
| CAT09-003         | 0.25           | 6            | $\geq 256^{**}$ |
| CAT09-003 CIP 1   | 2              | 0.75         | 24              |

|                 |                |      |                 |
|-----------------|----------------|------|-----------------|
| CAT09-003 CIP 2 | 1.5            | 4    | $\geq 256^{**}$ |
| CAT09-003 CIP 3 | 1              | 3    | $\geq 256^{**}$ |
| CAT09-003 CIP 4 | 1.5            | 1.5  | 48              |
| CLE03-004       | 0.125          | 3    | 1               |
| CLE03-004 CIP 1 | 2              | 2    | 0.75            |
| CLE03-004 CIP 2 | 2              | 1.5  | 0.75            |
| CLE03-004 CIP 3 | 2              | 1.5  | 0.75            |
| CLE03-004 CIP 4 | 2              | 0.75 | 1               |
| CLE03-006       | 3              | 4    | 4               |
| CLE03-006 CIP 1 | $\geq 32^{**}$ | 1.5  | 1.5             |
| CLE03-006 CIP 2 | $\geq 32^{**}$ | 1    | 1.5             |
| CLE03-006 CIP 3 | $\geq 32^{**}$ | 1    | 1.5             |
| CLE03-006 CIP 4 | $\geq 32^{**}$ | 0.75 | 1.5             |
| GAL02-002       | 0.38           | 8    | 8               |
| GAL02-002 CIP 1 | 1              | 8    | 6               |
| GAL02-002 CIP 2 | 0.75           | 6    | 8               |
| GAL02-002 CIP 3 | 0.75           | 12   | 8               |
| GAL02-002 CIP 4 | 1              | 8    | 8               |
| ICA01-004       | 0.094          | 4    | 1.5             |
| ICA01-004 CIP 1 | 1.5            | 1.5  | 0.75            |
| ICA01-004 CIP 2 | 2              | 16   | 1.5             |
| ICA01-004 CIP 3 | 1              | 2    | 2               |
| ICA01-004 CIP 4 | 0.75           | 2    | 1               |
| MAD04-002       | 0.19           | 6    | 2               |
| MAD04-002 CIP 1 | 3              | 3    | 1               |
| MAD04-002 CIP 2 | 3              | 2    | 1               |
| MAD04-002 CIP 3 | 3              | 6    | 1               |
| MAD04-002 CIP 4 | 3              | 4    | 1               |
| MAD05-008       | 0.5            | 8    | 4               |

|                   |       |     |   |
|-------------------|-------|-----|---|
| MAD05-008 CIP 1   | 4     | 2   | 2 |
| MAD05-008 CIP 2   | 3     | 2   | 3 |
| MAD05-008 CIP 3   | 2     | 2   | 2 |
| MAD05-008 CIP 4   | 3     | 2   | 2 |
| <hr/>             |       |     |   |
| PAMB148           | 0.094 | 96  | 4 |
| PAMB148 CIP 1     | 1.5   | 96  | 3 |
| PAMB148 CIP 2     | 1     | 96  | 3 |
| PAMB148 CIP 3     | 1     | 128 | 3 |
| PAMB148 CIP 4     | 0.75  | 128 | 3 |
| <hr/>             |       |     |   |
| FQSE10-0503       | 0.5   | 3   | 4 |
| FQSE10-0503 CIP 1 | 4     | 4   | 3 |
| FQSE10-0503 CIP 2 | 3     | 3   | 3 |
| FQSE10-0503 CIP 3 | 3     | 4   | 2 |
| FQSE10-0503 CIP 4 | 2     | 16  | 6 |

1 CIP: ciprofloxacin, ATM: aztreonam, TOB: tobramycin.

2 \* MICs of mixed populations are indicated as two different values separated by a forward  
3 slash (the percentage of bacteria belonging to the more resistant subpopulation is  
4 indicated in parenthesis).

5 \*\* MICs were above limits of detection.

6 EUCAST breakpoints for CIP, ATM and TOB are 0.5, 16 and 2 µg/ml, respectively.

7

8

1 **Supplementary Table 2. Ciprofloxacin, aztreonam and tobramycin MIC values**  
 2 **(µg/ml) in the final control populations of *P. aeruginosa* after ALE with no antibiotic.**

| Population           | MIC (µg/ml) |      |       |
|----------------------|-------------|------|-------|
|                      | CIP         | ATM  | TOB   |
| NAV01-005            | 0.5         | 0.38 | 12    |
| NAV01-005 Control 1  | 0.38        | 0.38 | 4     |
| NAV01-005 Control 2  | 0.38        | 0.38 | 6     |
| NAV01-005 Control 3  | 0.38        | 0.38 | 6     |
| NAV01-005 Control 4  | 0.5         | 0.38 | 8     |
| ARA03-004            | 1           | 8    | 4     |
| ARA03-004 Control 1  | 1           | 12   | 4     |
| ARA03-004 Control 2  | 1           | 12   | 4     |
| ARA03-004 Control 3  | 0.75        | 12   | 4     |
| ARA03-004 Control 4  | 1           | 12   | 3     |
| CVA02-003            | 0.38        | 4    | 48    |
| CVA02-003 Control 1  | 0.5         | 4    | 48    |
| CVA02-003 Control 2  | 0.5         | 4    | 48    |
| CVA02-003 Control 3  | 0.5         | 4    | 32    |
| CVA02-003 Control 4  | 0.5         | 4    | 48    |
| FQSE111010           | 0.5         | 0.75 | ≥256* |
| FQSE111010 Control 1 | 0.5         | 0.5  | ≥256* |
| FQSE111010 Control 2 | 0.5         | 0.75 | ≥256* |
| FQSE111010 Control 3 | 0.5         | 0.5  | ≥256* |
| FQSE111010 Control 4 | 0.5         | 0.75 | ≥256* |
| ARA02-005            | 0.125       | 3    | 1     |
| ARA02-005 Control 1  | 0.094       | 4    | 1     |
| ARA02-005 Control 2  | 0.125       | 3    | 1.5   |
| ARA02-005 Control 3  | 0.094       | 3    | 1     |
| ARA02-005 Control 4  | 0.125       | 3    | 1     |

|                      |       |      |      |
|----------------------|-------|------|------|
| BAL02-009            | 1     | 2    | 0.5  |
| BAL02-009 Control 1  | 1     | 2    | 0.5  |
| BAL02-009 Control 2  | 1     | 2    | 0.5  |
| BAL02-009 Control 3  | 1.5   | 2    | 0.5  |
| BAL02-009 Control 4  | 1     | 1.5  | 0.38 |
| BAL04-002            | 0.125 | 4    | 1    |
| BAL04-002 Control 1  | 0.094 | 3    | 1    |
| BAL04-002 Control 2  | 0.094 | 3    | 1.5  |
| BAL04-002 Control 3  | 0.064 | 3    | 1.5  |
| BAL04-002 Control 4  | 0.125 | 3    | 1    |
| CAN01-002            | 0.032 | 0.38 | 2    |
| CAN01-002 Control 1  | 0.38  | 0.38 | 1.5  |
| CAN01-002 Control 2  | 0.19  | 0.25 | 1.5  |
| CAN01-002 Control 3  | 0.38  | 0.25 | 1.5  |
| CAN01-002 Control 4  | 0.25  | 0.25 | 2    |
| CAT09-004            | 0.094 | 3    | 1.5  |
| CAT09-004 Control 1  | 0.064 | 2    | 1.5  |
| CAT09-004 Control 2  | 0.094 | 3    | 1.5  |
| CAT09-004 Control 3  | 0.094 | 3    | 1.5  |
| CAT09-004 Control 4  | 0.094 | 3    | 1.5  |
| FQSE110603           | 0.125 | 0.38 | 3    |
| FQSE110603 Control 1 | 0.125 | 0.38 | 3    |
| FQSE110603 Control 2 | 0.125 | 0.38 | 3    |
| FQSE110603 Control 3 | 0.125 | 0.38 | 3    |
| FQSE110603 Control 4 | 0.094 | 0.38 | 2    |
| AND04-004A           | 0.125 | 4    | 1    |
| AND04-004A Control 1 | 0.094 | 6    | 1    |
| AND04-004A Control 2 | 0.064 | 6    | 1    |
| AND04-004A Control 3 | 0.094 | 4    | 1.5  |

|                       |       |      |       |
|-----------------------|-------|------|-------|
| AND04-004A Control 4  | 0.094 | 4    | 1.5   |
| BAL02-001             | 0.047 | 6    | 2     |
| BAL02-001 Control 1   | 0.047 | 6    | 2     |
| BAL02-001 Control 2   | 0.047 | 6    | 1.5   |
| BAL02-001 Control 3   | 0.047 | 8    | 2     |
| BAL02-001 Control 4   | 0.047 | 6    | 2     |
| CAT06-005             | 16    | 4    | 48    |
| CAT06-005 Control 1   | 16    | 4    | 48    |
| CAT06-005 Control 2   | 16    | 4    | 48    |
| CAT06-005 Control 3   | 16    | 4    | 48    |
| CAT06-005 Control 4   | 16    | 4    | 32    |
| FQSE15-0803           | 0.38  | 0.38 | 3     |
| FQSE15-0803 Control 1 | 0.25  | 0.38 | 3     |
| FQSE15-0803 Control 2 | 0.25  | 0.38 | 3     |
| FQSE15-0803 Control 3 | 0.25  | 0.38 | 3     |
| FQSE15-0803 Control 4 | 0.25  | 0.38 | 3     |
| FQSE24-0304           | 3     | 0.38 | 4     |
| FQSE24-0304 Control 1 | 3     | 0.5  | 4     |
| FQSE24-0304 Control 2 | 2     | 0.5  | 3     |
| FQSE24-0304 Control 3 | 3     | 0.38 | 3     |
| FQSE24-0304 Control 4 | 3     | 0.38 | 4     |
| CAT02-004             | 0.5   | 12   | 0.75  |
| CAT02-004 Control 1   | 0.5   | 16   | 0.75  |
| CAT02-004 Control 2   | 0.38  | 12   | 0.5   |
| CAT02-004 Control 3   | 0.38  | 16   | 0.5   |
| CAT02-004 Control 4   | 0.5   | 12   | 0.5   |
| CAT09-003             | 0.25  | 6    | ≥256* |
| CAT09-003 Control 1   | 0.25  | 6    | ≥256* |
| CAT09-003 Control 2   | 0.25  | 6    | ≥256* |



|                     |       |   |       |
|---------------------|-------|---|-------|
| CAT09-003 Control 3 | 0.25  | 4 | ≥256* |
| CAT09-003 Control 4 | 0.25  | 6 | ≥256* |
| CLE03-004           | 0.125 | 3 | 1     |
| CLE03-004 Control 1 | 0.19  | 3 | 1.5   |
| CLE03-004 Control 2 | 0.19  | 3 | 1     |
| CLE03-004 Control 3 | 0.125 | 3 | 1.5   |
| CLE03-004 Control 4 | 0.19  | 3 | 2     |
| CLE03-006           | 3     | 4 | 4     |
| CLE03-006 Control 1 | 3     | 3 | 4     |
| CLE03-006 Control 2 | 3     | 4 | 4     |
| CLE03-006 Control 3 | 3     | 4 | 4     |
| CLE03-006 Control 4 | 3     | 3 | 3     |
| GAL02-002           | 0.38  | 8 | 8     |
| GAL02-002 Control 1 | 0.5   | 8 | 6     |
| GAL02-002 Control 2 | 0.5   | 8 | 6     |
| GAL02-002 Control 3 | 0.5   | 8 | 8     |
| GAL02-002 Control 4 | 0.5   | 8 | 8     |
| ICA01-004           | 0.094 | 4 | 1.5   |
| ICA01-004 Control 1 | 0.094 | 3 | 3     |
| ICA01-004 Control 2 | 0.094 | 3 | 1.5   |
| ICA01-004 Control 3 | 0.125 | 4 | 2     |
| ICA01-004 Control 4 | 0.125 | 3 | 1.5   |
| MAD04-002           | 0.19  | 6 | 2     |
| MAD04-002 Control 1 | 0.19  | 8 | 3     |
| MAD04-002 Control 2 | 0.19  | 6 | 2     |
| MAD04-002 Control 3 | 0.19  | 8 | 2     |
| MAD04-002 Control 4 | 0.19  | 6 | 2     |
| MAD05-008           | 0.5   | 8 | 4     |
| MAD05-008 Control 1 | 0.5   | 6 | 4     |

|                       |       |    |   |
|-----------------------|-------|----|---|
| MAD05-008 Control 2   | 0.5   | 8  | 6 |
| MAD05-008 Control 3   | 0.5   | 8  | 8 |
| MAD05-008 Control 4   | 0.5   | 8  | 4 |
| <hr/>                 |       |    |   |
| PAMB148               | 0.094 | 96 | 4 |
| PAMB148 Control 1     | 0.094 | 96 | 6 |
| PAMB148 Control 2     | 0.125 | 96 | 6 |
| PAMB148 Control 3     | 0.125 | 96 | 3 |
| PAMB148 Control 4     | 0.125 | 96 | 4 |
| <hr/>                 |       |    |   |
| FQSE10-0503           | 0.5   | 3  | 4 |
| FQSE10-0503 Control 1 | 0.5   | 4  | 4 |
| FQSE10-0503 Control 2 | 0.5   | 3  | 3 |
| FQSE10-0503 Control 3 | 0.5   | 4  | 4 |
| FQSE10-0503 Control 4 | 0.5   | 4  | 4 |

1 CIP: ciprofloxacin, ATM: aztreonam, TOB: tobramycin

2 \* MICs were above limits of detection.

3

4

5

6

7

8

9

10

11

12

13

- 1 **Supplementary Table 3. Ciprofloxacin, aztreonam and tobramycin MIC values ( $\mu\text{g/ml}$ ), original resistome and acquired mutations**  
 2 **encountered in the final populations of *P. aeruginosa* showing a significant collateral sensitivity after ALE on ciprofloxacin.**

| ISOLATE ID       | ST   | Hypermutator | CIP      | ATM    | TOB  | Baseline resistome                                                                                                                                          | Acquired mutations                                                                                      |
|------------------|------|--------------|----------|--------|------|-------------------------------------------------------------------------------------------------------------------------------------------------------------|---------------------------------------------------------------------------------------------------------|
| AND04-004A       |      |              | 0.125    | 4      | 1    |                                                                                                                                                             | -                                                                                                       |
| AND04-004A CIP 1 |      |              | 1        | 1      | 0.5  |                                                                                                                                                             | <i>mexS</i> (nt649 $\Delta$ 3-14.6%, nt421 $\Delta$ 1-18%)                                              |
| AND04-004A CIP 2 | 244  | NO           | 1        | 1.5    | 0.5  |                                                                                                                                                             | <i>mexS</i> (nt240 $\Delta$ 4-19.7%, nt370 $\Delta$ 3-13.6%)                                            |
| AND04-004A CIP 3 |      |              | 0.75/12* | 1.5    | 0.5  |                                                                                                                                                             | <i>mexS</i> (nt649 $\Delta$ 3-15%, nt421 $\Delta$ 1-11.5%)                                              |
| AND04-004A CIP 4 |      |              | 0.75     | 2      | 0.5  |                                                                                                                                                             | <i>mexS</i> (nt649 $\Delta$ 3-13.7%, nt421 $\Delta$ 1-26.4%)                                            |
| ARA02-005        |      |              | 0.125    | 3      | 1    |                                                                                                                                                             | -                                                                                                       |
| ARA02-005 CIP 1  |      |              | 4        | 0.19   | 0.38 |                                                                                                                                                             | <i>nfxB</i> (nt46ins9-12.8%, nt60 $\Delta$ 2-12.5%)                                                     |
| ARA02-005 CIP 2  | 267  | NO           | 3        | 0.25   | 0.38 | <i>oprN</i> (R151L), <i>armZ</i> (R320C)                                                                                                                    | <i>nfxB</i> (nt345 $\Delta$ 1-97.4%)                                                                    |
| ARA02-005 CIP 3  |      |              | 4        | 0.25   | 0.38 |                                                                                                                                                             | <i>nfxB</i> (L14R-100%)                                                                                 |
| ARA02-005 CIP 4  |      |              | 12       | 0.38   | 0.25 |                                                                                                                                                             | <i>nfxB</i> (K37M-95.1%, nt113 $\Delta$ 2-18.5%, nt121ins3-11.8%), <i>gyrB</i> (aa467 $\Delta$ 1-89.1%) |
| ARA03-004        |      |              | 1        | 8      | 4    |                                                                                                                                                             | -                                                                                                       |
| ARA03-004 CIP 1  | 845  | NO           | 12       | 4      | 2/1  | <i>gyrA</i> (D87N), <i>ampD</i> (Q131X), <i>mexT</i> (G246S), <i>mexB</i> (nt54 $\Delta$ 1), <i>mexZ</i> (nt302 $\Delta$ 9), <i>dacB</i> (nt781 $\Delta$ 1) | <i>nfxB</i> (nt222 $\Delta$ 1-93.4%)                                                                    |
| ARA03-004 CIP 3  |      |              | 8        | 2      | 1    |                                                                                                                                                             | <i>nfxB</i> (nt108 $\Delta$ 1-98.1%)                                                                    |
| BAL02-001        |      |              | 0.047    | 6      | 2    |                                                                                                                                                             | -                                                                                                       |
| BAL02-001 CIP 2  | 1619 | NO           | 0.38     | 16/6   | 1    |                                                                                                                                                             | <i>gyrA</i> (T83I-90.1%)                                                                                |
| BAL04-002        |      |              | 0.125    | 4      | 1    |                                                                                                                                                             | -                                                                                                       |
| BAL04-002 CIP 1  |      |              | 1.5      | 4/0.75 | 0.5  |                                                                                                                                                             | <i>mexS</i> (G136D-33%, S41R-39.9%, nt749 $\Delta$ 9-15.9%)                                             |
| BAL04-002 CIP 2  | 1816 | NO           | 2        | 0.75   | 0.38 | <i>mexA</i> (K86E), <i>ampR</i> (G295R), <i>ampC</i> (A278G), <i>parE</i> (E215Q)                                                                           | <i>nfxB</i> (nt61 $\Delta$ 1-91.5%)                                                                     |
| BAL04-002 CIP 3  |      |              | 1.5      | 1      | 0.5  |                                                                                                                                                             | <i>nfxB</i> (A158E-97.8%)                                                                               |
| BAL04-002 CIP 4  |      |              | 2        | 0.75   | 0.5  |                                                                                                                                                             | <i>nfxB</i> (Y118X-98.9%)                                                                               |
| CAN01-002        | 111  | NO           | 0.032    | 0.38   | 2    |                                                                                                                                                             | -                                                                                                       |

|                 |      |    |       |      |        |                                                                                                                                                                     |                                                       |
|-----------------|------|----|-------|------|--------|---------------------------------------------------------------------------------------------------------------------------------------------------------------------|-------------------------------------------------------|
| CAN01-002 CIP 1 |      |    | 1.5   | 0.19 | 0.75   | <i>mexB</i> (Q319X), <i>mexY</i> (G530S), <i>mexZ</i> (Q140K), <i>mexT</i> (G276D), <i>oprD</i> (nt174Δ11), <i>mexS</i> (nt300IS)                                   | <i>nfxB</i> (aa16ins3-13.3%, nt391Δ19-56%)            |
| CAN01-002 CIP 3 |      |    | 1     | 0.19 | 1      |                                                                                                                                                                     | <i>nfxB</i> (X188C-99%)                               |
| CAN01-002 CIP 4 |      |    | 0.5   | 0.25 | 0.75   |                                                                                                                                                                     | <i>nfxB</i> (X188C-94.3%)                             |
| CAT02-004       | 244  | NO | 0.5   | 12   | 0.75   | <i>mexR</i> (nt266Ins1), <i>dacB</i> (A340G)                                                                                                                        | -                                                     |
| CAT02-004 CIP 1 |      |    | 6     | 12   | 0.38   |                                                                                                                                                                     | <i>gyrA</i> (T83A-91.2%), <i>mexS</i> (nt964Δ1-96.8%) |
| CAT02-004 CIP 2 |      |    | 2     | 6    | 0.38   |                                                                                                                                                                     | <i>mexS</i> (nt964Δ1-61.7%, nt659ins9-21.7%)          |
| CAT02-004 CIP 4 |      |    | 3     | 6    | 0.38   |                                                                                                                                                                     | <i>mexS</i> (nt964Δ1-100%)                            |
| CAT06-005       | 175  | NO | 16    | 4    | 48     | <i>aadB</i> , <i>oprM</i> (T198P), <i>oprD</i> (Q142X), <i>mexZ</i> (G195D), <i>gyrA</i> (T83I, D87N), <i>ampR</i> (G154R), <i>parC</i> (S87W), <i>armZ</i> (V266M) | -                                                     |
| CAT06-005 CIP 1 |      |    | ≥32   | 1.5  | 24     |                                                                                                                                                                     | <i>mexS</i> (V215F-38.4%)                             |
| CAT06-005 CIP 2 |      |    | ≥32   | 3    | 24     |                                                                                                                                                                     | <i>mexS</i> (V215F-32.1%, nt224Δ12-11.1%)             |
| CAT06-005 CIP 3 |      |    | ≥32   | 2    | 24     |                                                                                                                                                                     | <i>mexS</i> (S234P-40.6%, nt532ins1-12.3%)            |
| CAT06-005 CIP 4 |      |    | ≥32   | 3    | 16     |                                                                                                                                                                     | <i>mexS</i> (V215F-30.9%, nt281Δ1-14.1%)              |
| CAT09-003       | 253  | NO | 0.25  | 6    | ≥256   | <i>aacA4</i> , <i>mexZ</i> (H51D)                                                                                                                                   | -                                                     |
| CAT09-003 CIP 1 |      |    | 2     | 0.75 | 24     |                                                                                                                                                                     | Not detected                                          |
| CAT09-003 CIP 3 |      |    | 1     | 3    | ≥256** |                                                                                                                                                                     | <i>mexS</i> (L263Q-38.9%, Q200X-51.1%)                |
| CAT09-003 CIP 4 |      |    | 1.5   | 1.5  | 48     |                                                                                                                                                                     | <i>mexS</i> (Q55X-15.6%)                              |
| CAT09-004       | 244  | NO | 0.094 | 3    | 1.5    |                                                                                                                                                                     | -                                                     |
| CAT09-004 CIP 1 |      |    | 3     | 0.5  | 0.25   |                                                                                                                                                                     | <i>nfxB</i> (L122R-96.5%), <i>gyrA</i> (A51V-34.3%)   |
| CAT09-004 CIP 2 |      |    | 4     | 0.5  | 0.5    |                                                                                                                                                                     | <i>nfxB</i> (Q64X-97.1%)                              |
| CAT09-004 CIP 3 |      |    | 1.5   | 0.75 | 0.5    |                                                                                                                                                                     | <i>nfxB</i> (nt499Δ1-94.4%)                           |
| CAT09-004 CIP 4 |      |    | 12    | 0.5  | 0.5    |                                                                                                                                                                     | <i>nfxB</i> (L122R-100%)                              |
| CLE03-004       | 381  | NO | 0.125 | 3    | 1      | <i>mexZ</i> (nt386Δ1)                                                                                                                                               | -                                                     |
| CLE03-004 CIP 2 |      |    | 2     | 1.5  | 0.75   |                                                                                                                                                                     | <i>mexS</i> (V288E-18.9%, P254R-44.6%)                |
| CLE03-004 CIP 3 |      |    | 2     | 1.5  | 0.75   |                                                                                                                                                                     | <i>mexS</i> (nt589ins3-11.4%, nt275Δ1-12.7%)          |
| CLE03-004 CIP 4 |      |    | 2     | 0.75 | 1      |                                                                                                                                                                     | <i>mexS</i> (nt589ins3-26.1%, nt275Δ1-13.7%)          |
| CLE03-006       | 1337 | NO | 3     | 4    | 4      | <i>parR</i> (aa214Δ1), <i>gyrA</i> (D87N), <i>ampD</i> (D59E)                                                                                                       | -                                                     |

|                   |     |                                |       |           |      |                                                                                                                                                                                                                                 |                                                                          |
|-------------------|-----|--------------------------------|-------|-----------|------|---------------------------------------------------------------------------------------------------------------------------------------------------------------------------------------------------------------------------------|--------------------------------------------------------------------------|
| CLE03-006 CIP 1   |     |                                | ≥32   | 1.5       | 1.5  |                                                                                                                                                                                                                                 | Not detected                                                             |
| CLE03-006 CIP 2   |     |                                | ≥32   | 1         | 1.5  |                                                                                                                                                                                                                                 | <i>nfxB</i> (nt4Δ1-12.3%)                                                |
| CLE03-006 CIP 3   |     |                                | ≥32   | 1         | 1.5  |                                                                                                                                                                                                                                 | Not detected                                                             |
| CLE03-006 CIP 4   |     |                                | ≥32   | 0.75      | 1.5  |                                                                                                                                                                                                                                 | <i>nfxB</i> (R42H-20.5%, X188C-59.3%)                                    |
| ICA01-004         | 698 | NO                             | 0.094 | 4         | 1.5  | <i>oprD</i> (D43N), <i>mexE</i> (V156A), <i>ampD</i> (E162Q), <i>armZ</i> (V266M), <i>mexY</i> (D428N)                                                                                                                          | -                                                                        |
| ICA01-004 CIP 1   |     |                                | 1.5   | 1.5       | 0.75 |                                                                                                                                                                                                                                 | Not detected                                                             |
| ICA01-004 CIP 3   |     |                                | 1     | 2         | 2    |                                                                                                                                                                                                                                 | <i>mexS</i> (Q297X-28.5%, A141D-42.9%)                                   |
| ICA01-004 CIP 4   |     |                                | 0.75  | 2         | 1    |                                                                                                                                                                                                                                 | <i>nfxB</i> (X188C-93.6%)                                                |
| FQSE11-0603       | 701 | NO                             | 0.125 | 0.38      | 3    | <i>mexB</i> (nt775Δ1), <i>mexY</i> (N709H, A586T), <i>mexX</i> (A38P), <i>oprN</i> (R363H), <i>ampDh2</i> (P116S)                                                                                                               | -                                                                        |
| FQSE11-0603 CIP 1 |     |                                | 2     | 0.25      | 1    |                                                                                                                                                                                                                                 | <i>mexS</i> (G63C-68%)                                                   |
| FQSE11-0603 CIP 2 |     |                                | 2     | 0.25      | 1    |                                                                                                                                                                                                                                 | <i>mexS</i> (nt677ins1-42.5%, nt331Δ1-30.8%)                             |
| FQSE11-0603 CIP 3 |     |                                | 2     | 0.25      | 0.75 |                                                                                                                                                                                                                                 | <i>mexS</i> (nt396ins2-11.5%, nt386Δ2-13.2%, nt316ins10-11.8%, nt300Δ94) |
| FQSE11-0603 CIP 4 |     |                                | 3     | 0.25      | 1    |                                                                                                                                                                                                                                 | <i>mexS</i> (nt618Δ1-81.8%)                                              |
| FQSE11-1010       | 701 | NO                             | 0.5   | 0.75      | ≥256 | <i>aacA4</i> , <i>aadB</i> , <i>gyrB</i> (R138L), <i>mexY</i> (N709H, A586T), <i>mexX</i> (A38P), <i>oprN</i> (R363H), <i>gyrA</i> (Y267N), <i>nfxB</i> (E75K), <i>ampDh2</i> (P116S), <i>mpl</i> (Q248X), <i>mexA</i> (nt45Δ1) | -                                                                        |
| FQSE11-1010 CIP 1 |     |                                | 6     | 0.38/0.19 | 128  |                                                                                                                                                                                                                                 | Not detected                                                             |
| FQSE11-1010 CIP 2 |     |                                | 4     | 0.38/0.19 | 128  |                                                                                                                                                                                                                                 | Not detected                                                             |
| FQSE11-1010 CIP 3 |     |                                | 4     | 0.38/0.19 | 128  |                                                                                                                                                                                                                                 | Not detected                                                             |
| FQSE11-1010 CIP 4 |     |                                | 4     | 0.38/0.25 | 192  |                                                                                                                                                                                                                                 | Not detected                                                             |
| FQSE15-0803       | 274 | YES<br>( <i>mutS</i> -nt814Δ4) | 0.38  | 0.38      | 3    | <i>mexA</i> (L338P), <i>mexZ</i> (A144V)                                                                                                                                                                                        | -                                                                        |
| FQSE15-0803 CIP 1 |     |                                | 2/6   | 0.25      | 1.5  |                                                                                                                                                                                                                                 | <i>mexS</i> (nt833ins15-15.4%)                                           |
| FQSE15-0803 CIP 2 |     |                                | 3     | 0.38      | 1    |                                                                                                                                                                                                                                 | <i>mexS</i> (nt770ins2-43.7%), <i>nfxB</i> (nt102ins5-47%)               |
| MAD04-002         | 242 | NO                             | 0.19  | 6         | 2    | <i>parC</i> (K726R)                                                                                                                                                                                                             | -                                                                        |
| MAD04-002 CIP 1   |     |                                | 3     | 3         | 1    |                                                                                                                                                                                                                                 | <i>nfxB</i> (X188C-34.5%, nt55Δ1-14.6%)                                  |
| MAD04-002 CIP 2   |     |                                | 3     | 2         | 1    |                                                                                                                                                                                                                                 | <i>nfxB</i> (F177S-38.2%)                                                |
| MAD04-002 CIP 3   |     |                                | 3     | 6         | 1    |                                                                                                                                                                                                                                 | <i>nfxB</i> (X188C-45.4%, nt532ins1-11.4%)                               |
| MAD04-002 CIP 4   |     |                                | 3     | 4         | 1    |                                                                                                                                                                                                                                 | <i>nfxB</i> (F177S-37.3%, nt532ins1-21.8%)                               |

|                 |      |    |     |      |      |                                                                                                                                                                                                                      |                                                                         |
|-----------------|------|----|-----|------|------|----------------------------------------------------------------------------------------------------------------------------------------------------------------------------------------------------------------------|-------------------------------------------------------------------------|
| MAD05-008       |      |    | 0.5 | 8    | 4    |                                                                                                                                                                                                                      | -                                                                       |
| MAD05-008 CIP 1 |      |    | 4   | 2    | 2    |                                                                                                                                                                                                                      | <i>nfxB</i> (R42H-51.8%, nt487Δ1-20.7%)                                 |
| MAD05-008 CIP 2 | 1717 | NO | 3   | 2    | 3    | <i>parS</i> (V152A), <i>mexY</i> (T238I)                                                                                                                                                                             | <i>nfxB</i> (G129X-42.7%, nt315Δ11-23.2%)                               |
| MAD05-008 CIP 3 |      |    | 2   | 2    | 2    |                                                                                                                                                                                                                      | <i>nfxB</i> (G58X-100%)                                                 |
| MAD05-008 CIP 4 |      |    | 3   | 2    | 2    |                                                                                                                                                                                                                      | <i>nfxB</i> (P22L-70%)                                                  |
| NAV01-005       |      |    | 0.5 | 0.38 | 12   |                                                                                                                                                                                                                      | -                                                                       |
| NAV01-005 CIP 2 |      |    | 6   | 0.19 | 8/3  | <i>gyrB</i> (P749S), <i>mexB</i> (P190L), <i>oprD</i> (nt742Δ1), <i>mexZ</i> (R104W), <i>galU</i> (F248S), <i>fusA1</i> (Y552C), <i>mexD</i> (L1027V), <i>mexC</i> (V367A), <i>pmrB</i> (A173T), <i>armZ</i> (A262S) | <i>nfxB</i> (nt172Δ2-47.4%, nt84Δ17-17.5%), <i>mexS</i> (nt61Δ14-10.2%) |
| NAV01-005 CIP 3 | 1637 | NO | 4   | 0.19 | 6/2  |                                                                                                                                                                                                                      | <i>nfxB</i> (nt350Δ11-92.6%)                                            |
| NAV01-005 CIP 4 |      |    | 6   | 0.19 | 12/4 |                                                                                                                                                                                                                      | <i>nfxB</i> (nt289Δ16-31.7%, nt19ins3-11.8%, nt30Δ1-10.7%)              |

1 CIP: ciprofloxacin, ATM: aztreonam, TOB: tobramycin, Δ: deletion, Ins: insertion. IS: insertion sequence. X: stop codon.

2 \* MICs of mixed populations are indicated as two different values separated by a forward slash.

3

4

5
